# Supplementary material for: Concomitant Medication Usage with Levodopa‐Carbidopa Intestinal Gel: Results from the COSMOS Study
Source: PubMed Central journal article supplement — Mov Disord. 2021 Apr 28;36(8):1853–62. doi: 10.1002/mds.28596 (PMC8453961; doi:10.1002/mds.28596), 2021-04-28

## Concomitant Medication Usage With Levodopa-Carbidopa Intestinal Gel: Results From the COSMOS Study

### Supplemental Information

Alfonso Fasano, MD, PhD,<sup>1\*</sup> Tanya Gurevich, MD,<sup>2</sup> Robert Jech, MD, PhD,<sup>3</sup> Norbert Kovács, MD, DSc,<sup>4</sup> Per Svenningsson, MD, PhD,<sup>5</sup> József Szász, MD, PhD,<sup>6</sup> Juan Carlos Parra, PharmD,<sup>7</sup> Lars Bergmann, MD,<sup>7</sup> Anita Johnson,<sup>7</sup> Olga Sanchez-Soliño, MD,<sup>7</sup> Zhongwen Tang, PhD,<sup>7</sup> and Lydia Vela-Desojo, MD<sup>8</sup>

<sup>1</sup>Edmond J Safra Program in Parkinson's Disease and the Morton and Gloria Shulman Movement Disorders Clinic, Toronto Western Hospital and Division of Neurology, UHN, Division of Neurology, University of Toronto, Toronto, Ontario, Canada, and Krembil Research Institute, Toronto, Ontario, Canada

<sup>2</sup>Movement Disorders Unit, Neurological Institute, Tel Aviv Sourasky Medical Center, and Tel Aviv University

<sup>3</sup>Department of Neurology and Center of Clinical Neurosciences, 1st Faculty of Medicine, Charles University in Prague and General University Hospital in Prague, Prague, Czech Republic

<sup>4</sup>University of Pécs Medical School, Pécs, Hungary

<sup>5</sup>Department of Clinical Neuroscience, Section for Neurology, Karolinska Institutet, Stockholm, Sweden

<sup>6</sup>George Emil Palade University of Medicine, Pharmacy, Science and Technology of Tîrgu Mureş, Emergency Clinical County Hospital Tîrgu Mureş, Romania

<sup>7</sup>AbbVie Inc., North Chicago, Illinois, USA

<sup>8</sup>Department of Neurology, Hospital Universitario Fundación Alcorcón, Alcorcón, Madrid, Spain

**Supplemental Table 1.** Unified Parkinson's Disease Rating Scale Part V: Modified Hoehn & Yahr Scores Before LCIG Initiation

| Description                       | LCIG monotherapy <sup>a</sup><br>N = 120 |      | LCIG daytime monotherapy <sup>a</sup><br>N = 94 |      | LCIG polytherapy <sup>a</sup><br>N = 164 |      | Total population<br>N = 409 |      |
|-----------------------------------|------------------------------------------|------|-------------------------------------------------|------|------------------------------------------|------|-----------------------------|------|
|                                   | n                                        | %    | n                                               | %    | n                                        | %    | n                           | %    |
| UPDRS Part V: modified H&Y scores |                                          |      |                                                 |      |                                          |      |                             |      |
| Stage 1–2.5                       | 14                                       | 20.3 | 20                                              | 40.8 | 21                                       | 25.6 | 60                          | 26.9 |
| Stage 1                           | 0                                        | 0    | 1                                               | 2.0  | 2                                        | 2.4  | 3                           | 1.3  |
| Stage 1.5                         | 1                                        | 1.4  | 0                                               | 0    | 0                                        | 0    | 1                           | 0.4  |
| Stage 2                           | 4                                        | 5.8  | 7                                               | 14.3 | 8                                        | 9.8  | 23                          | 10.3 |
| Stage 2.5                         | 9                                        | 13.0 | 12                                              | 24.5 | 11                                       | 13.4 | 33                          | 14.8 |
| Stage 3–5                         | 55                                       | 79.7 | 29                                              | 59.2 | 61                                       | 74.4 | 163                         | 73.1 |
| Stage 3                           | 34                                       | 49.3 | 16                                              | 32.7 | 36                                       | 43.9 | 96                          | 43.0 |
| Stage 4                           | 20                                       | 29.0 | 11                                              | 22.4 | 23                                       | 28.0 | 62                          | 27.8 |
| Stage 5                           | 1                                        | 1.4  | 2                                               | 4.1  | 2                                        | 2.4  | 5                           | 2.2  |

H&Y, Hoehn & Yahr; UPDRS, Unified Parkinson's Disease Rating Scale.

<sup>a</sup>Patients were grouped by their treatment regimen at 12 months with 31 patients missing data, these patients are included in the total population.

**Supplemental Table 2.** Reasons for initiation of LCIG therapy

| Reason for starting LCIG               | LCIG                     |      |                                       |      |                               |      | Total population |      |
|----------------------------------------|--------------------------|------|---------------------------------------|------|-------------------------------|------|------------------|------|
|                                        | monotherapy <sup>a</sup> |      | LCIG daytime monotherapy <sup>a</sup> |      | LCIG polytherapy <sup>a</sup> |      | N = 409          |      |
|                                        | n                        | %    | n                                     | %    | n                             | %    | n                | %    |
| Disabling motor fluctuations           | 109                      | 90.8 | 89                                    | 94.7 | 147                           | 89.6 | 375              | 91.7 |
| Decrease in QoL                        | 66                       | 55.0 | 58                                    | 61.7 | 96                            | 58.5 | 231              | 56.5 |
| Uncontrolled dyskinesia                | 53                       | 44.2 | 51                                    | 54.3 | 95                            | 57.9 | 210              | 51.3 |
| Lack of efficacy of previous treatment | 59                       | 49.2 | 53                                    | 56.4 | 84                            | 51.2 | 206              | 50.4 |
| Safety                                 | 17                       | 14.2 | 11                                    | 11.7 | 19                            | 11.6 | 47               | 11.5 |
| Other                                  | 3                        | 2.5  | 3                                     | 3.2  | 3                             | 1.8  | 10               | 2.4  |

LCIG, levodopa-carbidopa intestinal gel; PD, Parkinson's disease; QoL, quality of life.

<sup>a</sup>Patients were grouped by their treatment regimen at 12 months with 31 patients missing data, these patients are included in the total population.

**Supplemental Table 3. LCIG infusion settings**

|                                                 | <b>LCIG Monotherapy</b> | <b>LCIG Daytime Monotherapy</b> | <b>LCIG Polytherapy</b> | <b>Total Population</b> |
|-------------------------------------------------|-------------------------|---------------------------------|-------------------------|-------------------------|
| <b>Duration of LCIG treatment (at month 12)</b> | n=118                   | n=94                            | n=164                   | n=389                   |
| Months, mean $\pm$ SD                           | 39.3 $\pm$ 25.6         | 31.8 $\pm$ 22.3*                | 35.7 $\pm$ 21.9         | 35.8 $\pm$ 23.2         |
| <b>Nasogastric test phase performed, n (%)</b>  | 112 (93.3%)             | 73 (77.7%)*                     | 137 (83.5%)*            | 350 (85.6%)             |
| <b>Duration of LCIG titration</b>               | n=117                   | n=93                            | n=163                   | n=393                   |
| Days, mean $\pm$ SD                             | 6.0 $\pm$ 3.4           | 8.8 $\pm$ 6.2***                | 7.9 $\pm$ 7.9           | 7.5 $\pm$ 6.4           |
| <b>LCIG Infusion (at month 12)</b>              | n=114                   | n=92                            | n=157                   | n=376                   |
| Hours/day, mean $\pm$ SD                        | 16.2 $\pm$ 2.9          | 15.8 $\pm$ 1.1                  | 16.1 $\pm$ 2.8          | 16.1 $\pm$ 2.5          |

P-values indicate significant difference compared with LCIG monotherapy:  $P < .001$  (\*\*\*) and  $P < .05$  (\*). LCIG = levodopa-carbidopa intestinal gel; PD = Parkinson's disease; SD = standard deviation.

**Supplemental Table 4** Percentage of patients with reported add-on PD medication usage by class and LCIG treatment regimen over time<sup>a</sup>

|                                          | At LCIG initiation | Month 3    | Month 6    | Month 9    | Month 12   |
|------------------------------------------|--------------------|------------|------------|------------|------------|
| <b>LCIG monotherapy (N = 120)</b>        |                    |            |            |            |            |
| Any medication                           | 62 (51.7)          | 12 (10.0)  | 8 (6.7)    | 4 (3.3)    | 0          |
| Levodopa <sup>b</sup>                    | 56 (46.7)          | 6 (5.0)    | 2 (1.7)    | 0          | 0          |
| DA                                       | 20 (16.7)          | 5 (4.2)    | 4 (3.3)    | 2 (1.7)    | 0          |
| MAO-B inhibitors                         | 8 (6.7)            | 0          | 0          | 0          | 0          |
| COMT inhibitors                          | 5 (4.2)            | 0          | 0          | 0          | 0          |
| NMDA antagonists                         | 6 (5.0)            | 2 (1.7)    | 2 (1.7)    | 2 (1.7)    | 0          |
| APO injection                            | 0                  | 0          | 0          | 0          | 0          |
| APO CI                                   | 0                  | 0          | 0          | 0          | 0          |
| Anticholinergics                         | 1 (0.8)            | 0          | 0          | 0          | 0          |
| Other                                    | 0                  | 0          | 0          | 0          | 0          |
| <b>LCIG daytime monotherapy (N = 94)</b> |                    |            |            |            |            |
| Any medication                           | 82 (87.2)          | 88 (93.6)  | 90 (95.7)  | 92 (97.9)  | 94 (100)   |
| Levodopa <sup>b</sup>                    | 79 (84.0)          | 80 (85.1)  | 83 (88.3)  | 85 (90.4)  | 87 (92.6)  |
| DA                                       | 34 (36.2)          | 21 (22.3)  | 21 (22.3)  | 22 (23.4)  | 22 (23.4)  |
| MAO-B inhibitors                         | 5 (5.3)            | 0          | 0          | 0          | 0          |
| COMT inhibitors                          | 8 (8.5)            | 0          | 0          | 0          | 0          |
| NMDA antagonists                         | 4 (4.3)            | 0          | 0          | 0          | 0          |
| APO injection                            | 0                  | 0          | 0          | 0          | 0          |
| APO CI                                   | 0                  | 0          | 0          | 0          | 0          |
| Anticholinergics                         | 1 (1.1)            | 0          | 0          | 0          | 0          |
| Other                                    | 1 (1.1)            | 2 (2.1)    | 2 (2.1)    | 2 (2.1)    | 2 (2.1)    |
| <b>LCIG polytherapy (N = 164)</b>        |                    |            |            |            |            |
| Any medication                           | 151 (92.1)         | 157 (95.7) | 161 (98.2) | 162 (98.8) | 164 (100)  |
| Levodopa <sup>b</sup>                    | 99 (60.4)          | 77 (47.0)  | 78 (47.6)  | 77 (47.0)  | 78 (47.6)  |
| DA                                       | 83 (50.6)          | 85 (51.8)  | 83 (50.6)  | 81 (49.4)  | 82 (50.0)  |
| MAO-B inhibitors                         | 57 (34.8)          | 46 (28.0)  | 44 (26.8)  | 44 (26.8)  | 44 (26.8)  |
| COMT inhibitors                          | 19 (11.6)          | 5 (3.0)    | 3 (1.8)    | 3 (0.7)    | 3 (1.8)    |
| NMDA antagonists                         | 32 (19.5)          | 38 (23.2)  | 41 (25.0)  | 42 (25.6)  | 44 (26.8)  |
| APO injection                            | 3 (1.8)            | 0          | 0          | 0          | 0          |
| APO CI                                   | 2 (1.2)            | 0          | 0          | 0          | 0          |
| Anticholinergics                         | 9 (5.5)            | 7 (4.3)    | 8 (4.9)    | 7 (4.3)    | 7 (4.3)    |
| Other                                    | 8 (4.9)            | 11 (6.7)   | 11 (6.7)   | 11 (6.7)   | 11 (6.7)   |
| <b>Total population (N = 409)</b>        |                    |            |            |            |            |
| Any medication                           | 296 (72.4)         | 259 (63.3) | 261 (63.8) | 260 (63.6) | 260 (63.6) |
| Levodopa <sup>b</sup>                    | 234 (57.2)         | 164 (40.1) | 164 (40.1) | 163 (39.9) | 166 (63.8) |

|                  |            |            |            |            |            |
|------------------|------------|------------|------------|------------|------------|
| DAs              | 138 (33.7) | 112 (27.4) | 109 (26.7) | 106 (25.9) | 105 (25.7) |
| MAO-B inhibitors | 70 (17.1)  | 46 (11.2)  | 44 (10.8)  | 44 (10.8)  | 44 (10.8)  |
| COMT inhibitors  | 32 (7.8)   | 5 (1.2)    | 3 (0.7)    | 3 (0.7)    | 3 (0.7)    |
| NMDA antagonists | 42 (10.3)  | 40 (9.8)   | 43 (10.5)  | 44 (10.8)  | 44 (10.8)  |
| APO injection    | 3 (0.7)    | 0          | 0          | 0          | 0          |
| APO CI           | 2 (0.5)    | 0          | 0          | 0          | 0          |
| Anticholinergics | 11 (2.7)   | 7 (1.7)    | 8 (2.0)    | 7 (1.7)    | 7 (1.7)    |
| Other            | 9 (2.2)    | 13 (3.2)   | 13 (3.2)   | 13 (3.2)   | 13 (3.2)   |

Data are presented as n (%).

APO, apomorphine; CI, continuous infusion; COMT, catechol-O-methyl transferase; DA, dopamine agonist; LCIG, levodopa-carbidopa intestinal gel; MAO-B, monoamine oxidase-B; NMDA, *N*-methyl-*D*-aspartate; PD, Parkinson's disease.

<sup>a</sup>Based on the retrospective review of patient charts and are calculated for patients with reported medication usage and excluding the use of rescue medication.

<sup>b</sup>Levodopa use included levodopa/carbidopa, levodopa/carbidopa/entacapone, and/or levodopa/benserazide. Patient medication use at month 12 was used to group patients for this analysis.

**Supplemental Table 5.** Predictors of LCIG monotherapy treatment

| Variable                                                                                        | Odds ratio estimate | Standard Error | Wald Chi-Square | Lower 95% limit | Upper 95% limit | <i>P</i> value |
|-------------------------------------------------------------------------------------------------|---------------------|----------------|-----------------|-----------------|-----------------|----------------|
| Patient variables                                                                               |                     |                |                 |                 |                 |                |
| Number of motor symptoms                                                                        | 0.828               | 0.076          | 6.244           | 0.714           | 0.960           | 0.0125         |
| Any DA use in the past                                                                          | 1.743               | 0.238          | 5.464           | 1.094           | 2.777           | 0.0194         |
| Site, HCP, and country variables                                                                |                     |                |                 |                 |                 |                |
| Gross national income                                                                           | 0.976               | 0.009          | 6.6216          | 0.958           | 0.994           | 0.0101         |
| Average frequency of routine visits for PD patients on device-aided therapy $\geq 3$ times/year | 2.297               | 0.341          | 5.964           | 1.178           | 4.478           | 0.0146         |
| Approximate number of APD patients treated with LCIG per year                                   | 1.019               | 0.00949        | 3.8774          | 1.000           | 1.038           | 0.0489         |
| Years of LCIG experience                                                                        | 0.918               | 0.0439         | 3.813           | 0.842           | 1.000           | 0.0509         |

APD, advanced Parkinson's disease; HCP, healthcare provider; LCIG, levodopa-carbidopa intestinal gel; PD, Parkinson's disease.



**Supplemental FIG. 1.** Dosages of levodopa-carbidopa intestinal gel (LCIG) and add-on medications. Total levodopa equivalent daily dose (LEDD) of LCIG and add-on medications (**A**). Total LEDD for add-on medications (**B**). LCIG total daily dose (**C**).

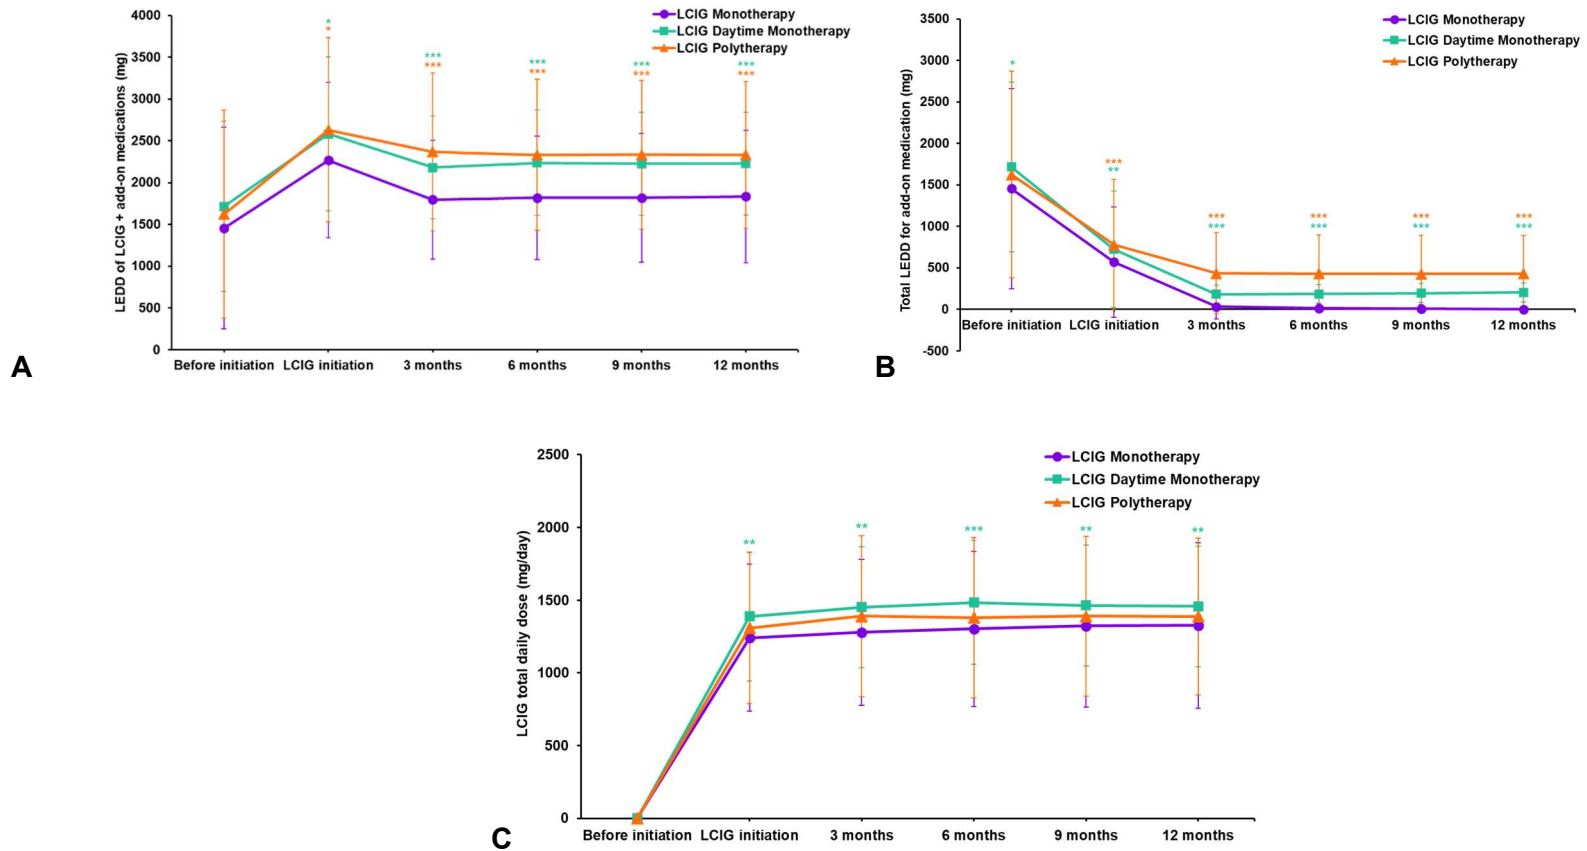

\* $P < 0.05$ , \*\* $P < 0.01$ , and \*\*\* $P < 0.001$  compared with LCIG monotherapy.

**Supplemental FIG 2.** Percent change from baseline to month 12 in A) motor and B) nonmotor symptoms by treatment regimen. Prevalence of nonmotor symptoms is based on physicians' judgment of the presence of absence of each symptom at each time point. Gray dotted line represents change for all treatments combined. LCIG, levodopa-carbidopa intestinal gel

Suppl 2A.

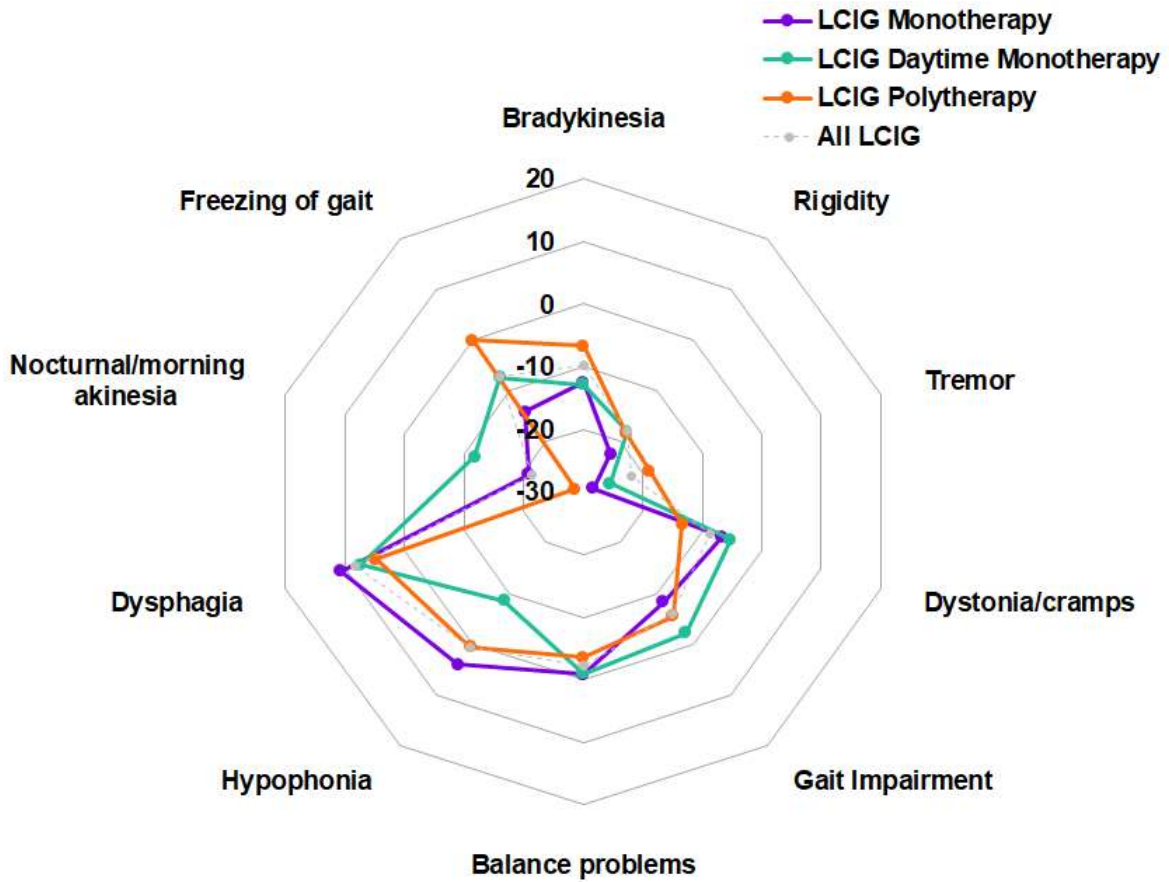

Suppl 2B.

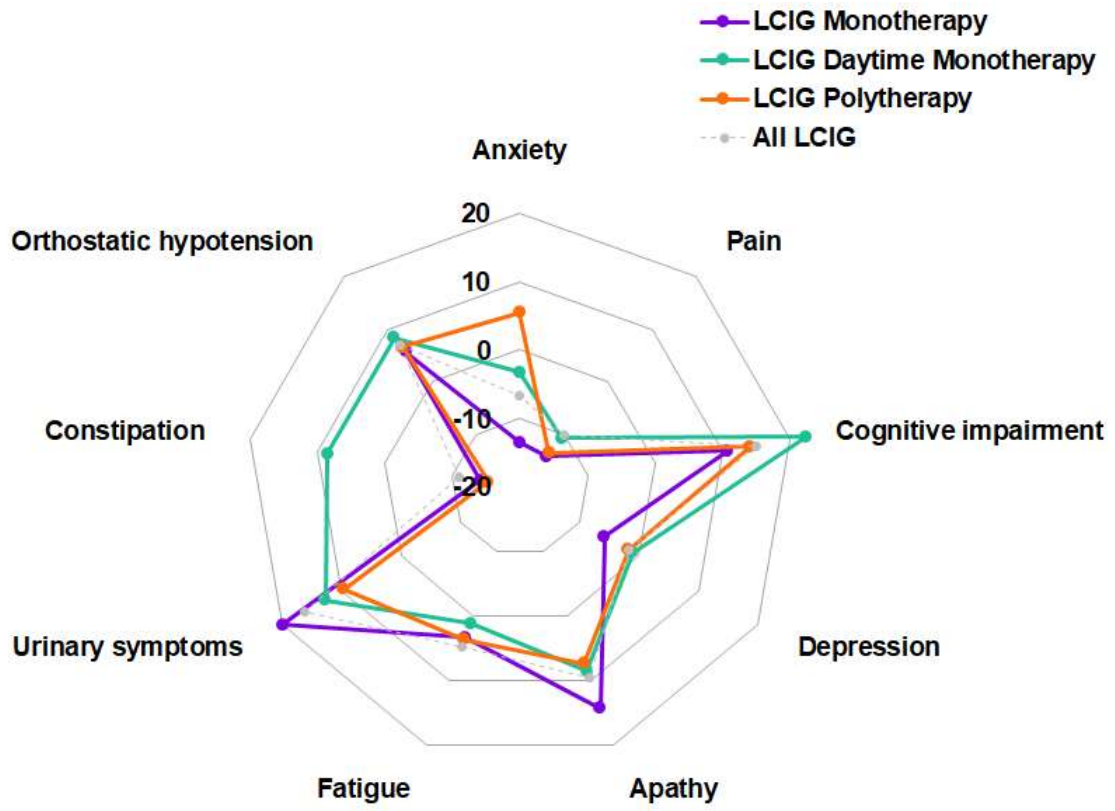

Supplement: MDS-36-1853-s001.pdf [file MDS-36-1853-s001.pdf]
